# Supplementary material for: Synthesis and characterization of semiaromatic polyamides comprising benzofurobenzofuran repeating units
Source: Royal Society of Chemistry journal article supplement (doi:10.1039/c7py00129k), 2017-01-01

# Synthesis and Characterization of Semiaromatic Polyamides Comprising Benzofurobenzofuran Repeating Units

## Electronic Supplementary Information

Julien Cretenoud,<sup>1</sup> Bilal Özen,<sup>1</sup> Thomas Schmaltz,<sup>1</sup> Daniel Görl,<sup>1</sup> Alberto Fabrizio,<sup>2</sup>  
Clémence Corminboeuf,<sup>2</sup> Farzaneh Fadaei Tirani,<sup>3</sup> Rosario Scopelliti,<sup>3</sup> Holger Frauenrath<sup>1,\*</sup>

<sup>1</sup> Ecole Polytechnique Fédérale de Lausanne (EPFL)  
Institute of Materials  
Laboratory of Macromolecular and Organic Materials

EPFL-STI-IMX-LMOM  
MXG 037, Station 12  
1015 Lausanne, Switzerland

holger.frauenrath@epfl.ch

<sup>2</sup> Ecole Polytechnique Fédérale de Lausanne (EPFL)  
Institute of Chemical Science and Engineering  
Computational Molecular Design Laboratory

<sup>3</sup> Ecole Polytechnique Fédérale de Lausanne (EPFL)  
Institute of Chemical Science and Engineering

## Table of Contents

|                                      |    |
|--------------------------------------|----|
| 1. Supplementary Figures S1–S8 ..... | 2  |
| 2. Supplementary Tables S1–S2 .....  | 10 |
| 3. NMR Spectra .....                 | 12 |

1. Supplementary Figures S1-S6

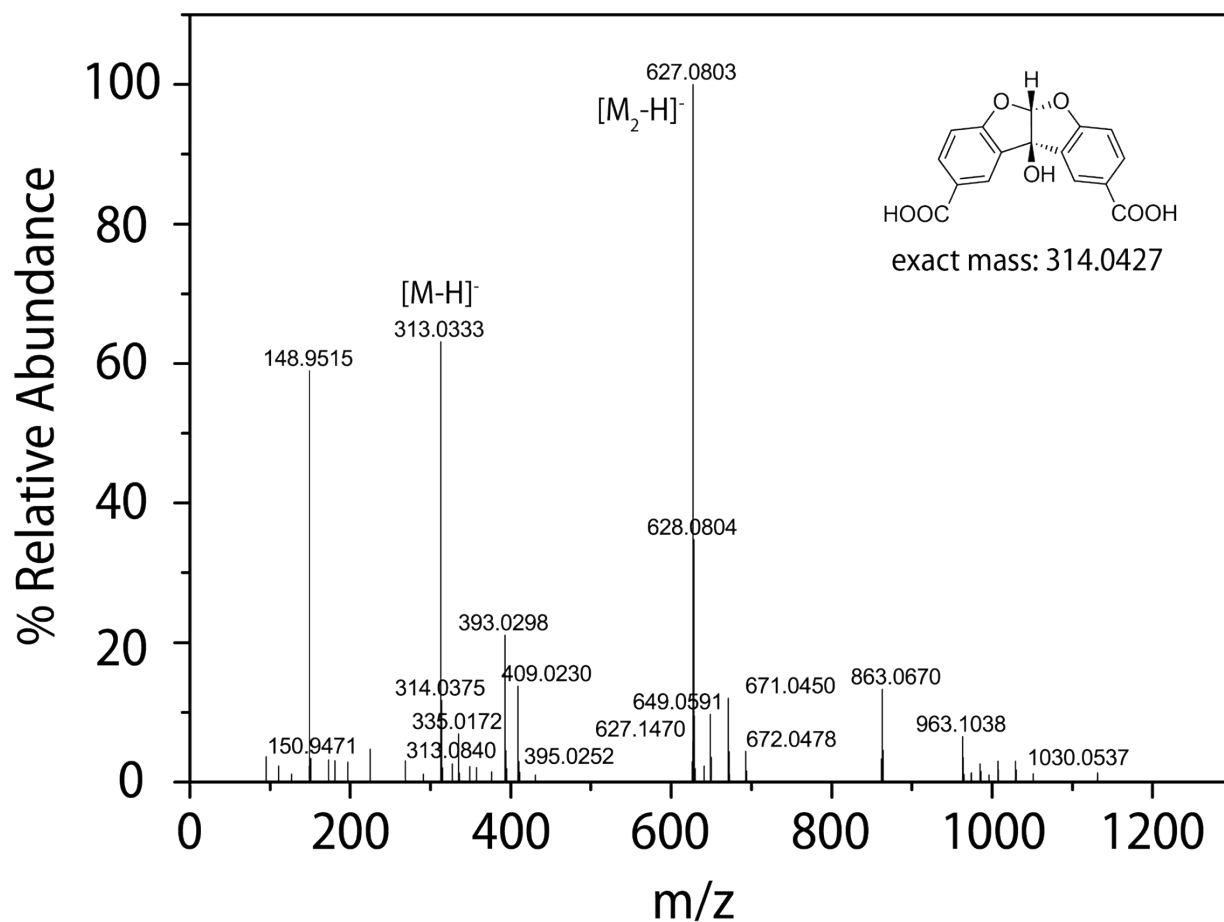

**Supplementary Figure S1.** High-resolution mass spectrum (MALDI-ToF, negative-mode) of *cis*-5a-hydro-10b-hydrobenzofuro[2,3-*b*]benzofuran-2,9-dicarboxylic acid 3.

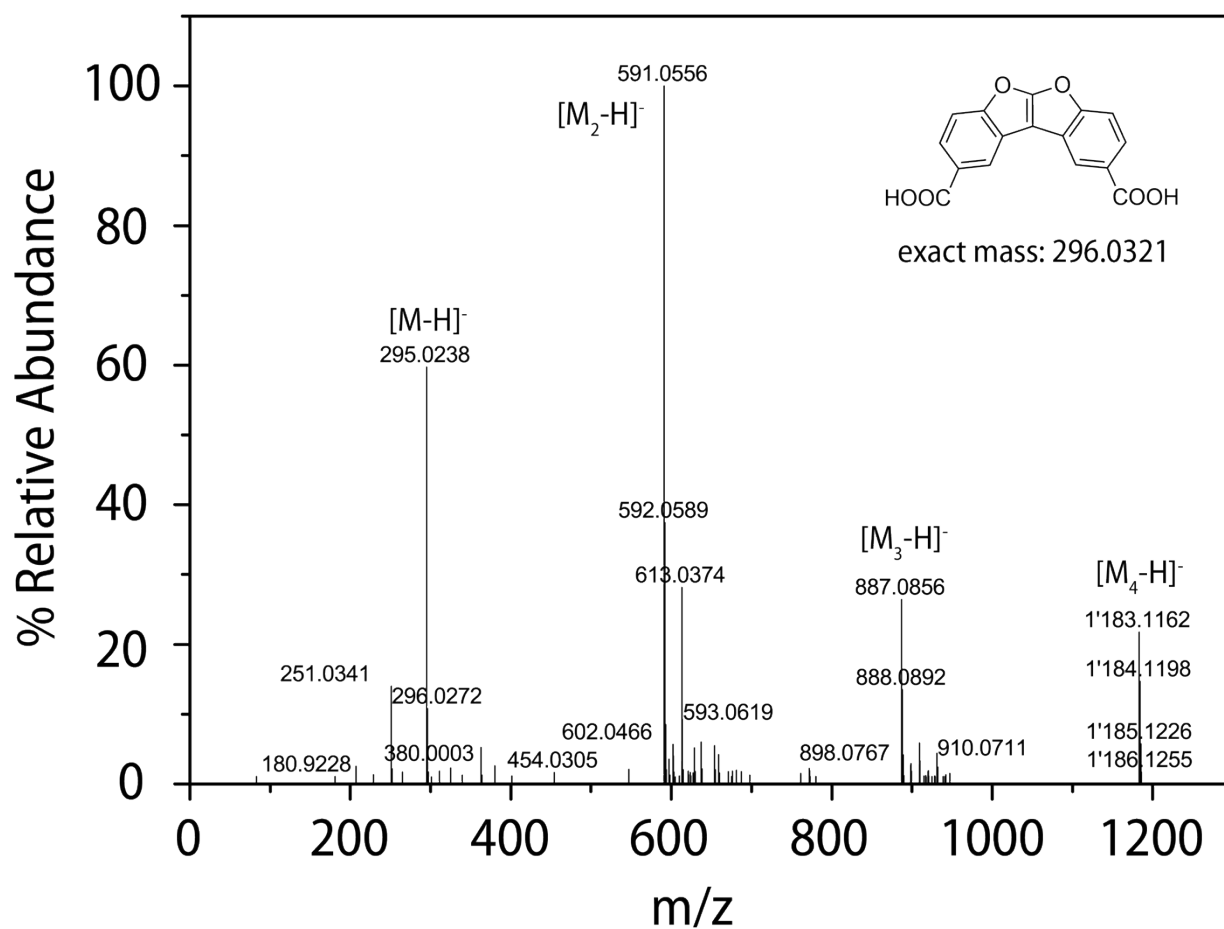

**Supplementary Figure S2.** High-resolution mass spectrum (MALDI-ToF, negative-mode) of benzofuro[2,3-*b*]benzofuran-2,9-dicarboxylic acid **2**.

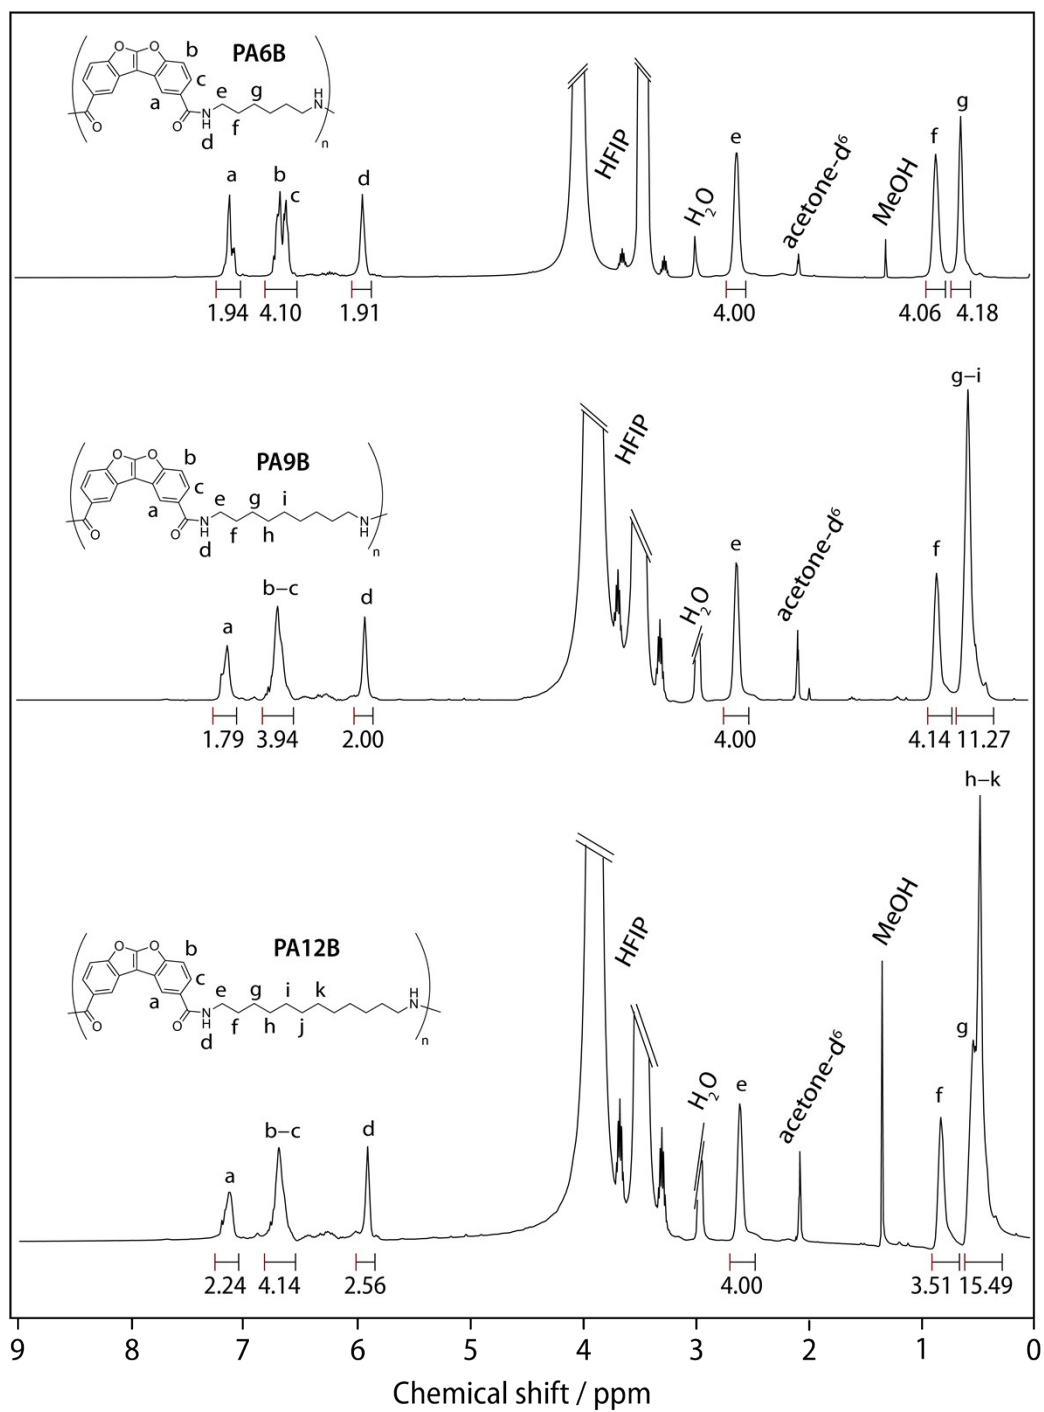

**Supplementary Figure S3.** <sup>1</sup>H-NMR spectra of the polyamides **PA6B**, **PA9B** and **PA12B** recorded in HFIP/acetone-*d*<sup>6</sup>. The amide protons of the repeating unit are visible at 5.90–5.92 ppm. The *b* and *c* protons of the heterocyclic benzofurobenzofuran core can only be differentiated in the case of **PA6B**.

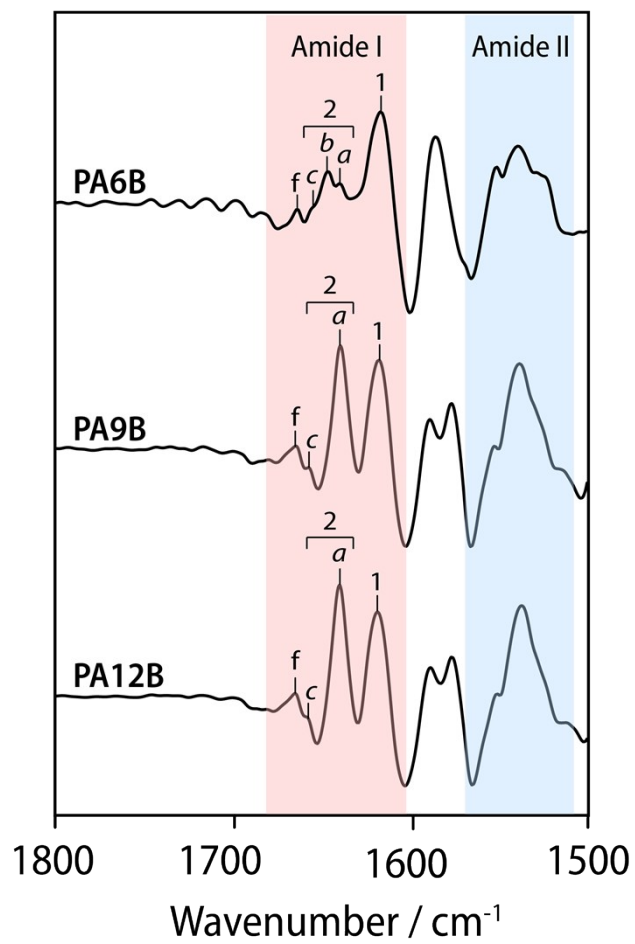

**Supplementary Figure S4.** Second derivative analysis of the IR spectra of the amide I and amide II regions of the polyamides **PA6B**, **PA9B** and **PA12B**.

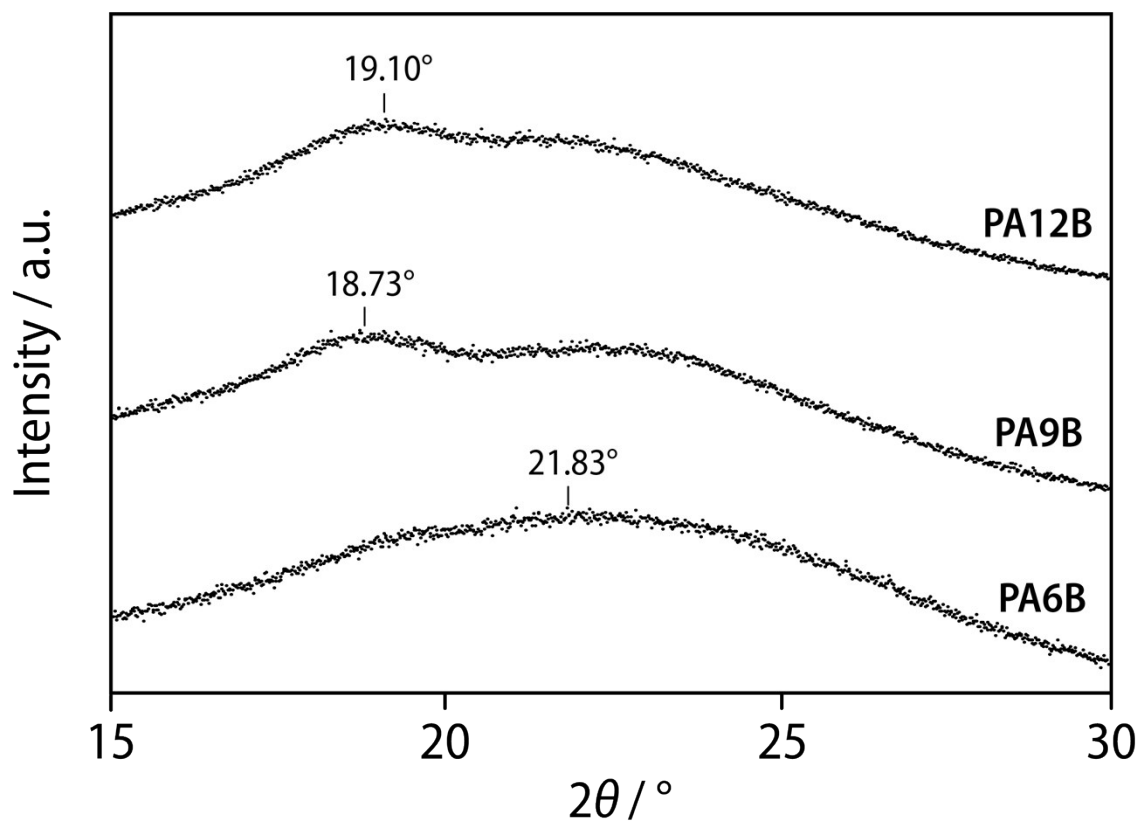

**Supplementary Figure S5.** Wide-angle X-ray scattering (WAXS) of the polyamides **PA6B**, **PA9B** and **PA12B**. **PA6B** shows an amorphous halo centered at  $2\theta = 21.83^\circ$ , as well as a broad diffraction peak at  $2\theta = 18.73^\circ$  and  $19.10^\circ$  for **PA9B** and **PA12B**, respectively.

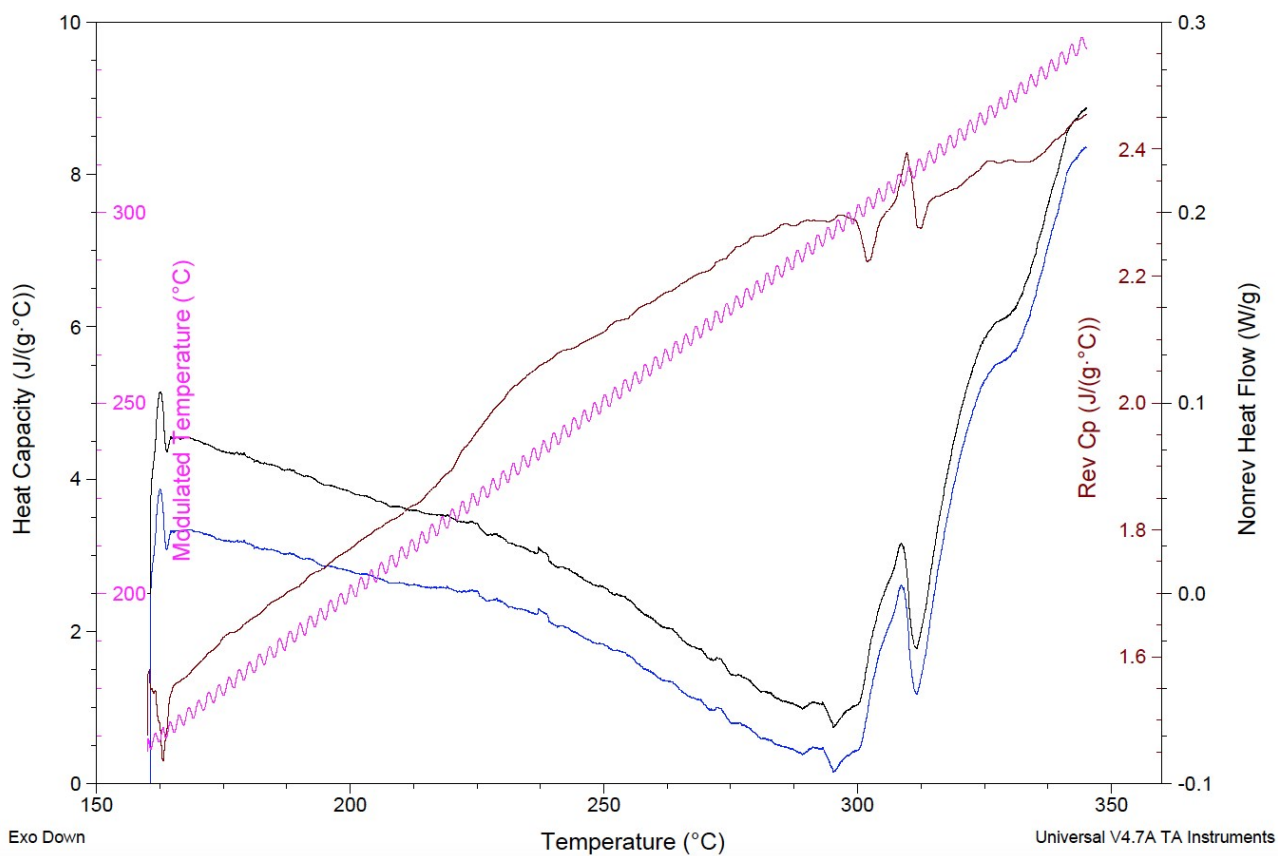

**Supplementary Figure S6.** Modulated differential scanning calorimetry (M-DSC) of benzofuro[2,3-*b*]benzofuran-2,9-dicarboxylic acid **2**. The observed  $T_g$  (220°C) is higher than the one measured with the conventional DSC due to the lower heating rate (1°C/min for M-DSC versus 10°C/min for conventional DSC).



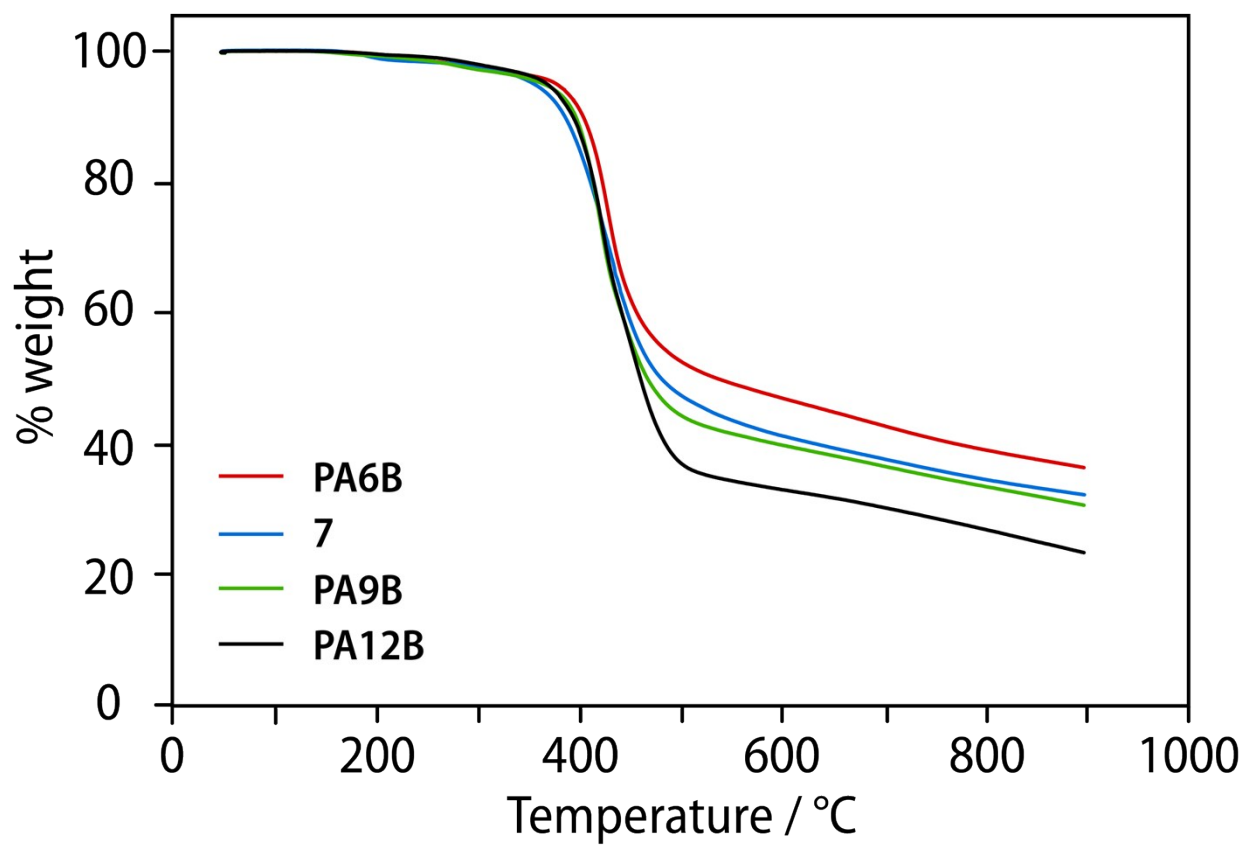

Supplementary Figure S7. TGA of the polyamides PA6B, PA9B and PA12B and the model compound 7 in nitrogen.

ADC(2)/def2-SVP

TDA-PBE0/def2-SVP

S<sub>1</sub>

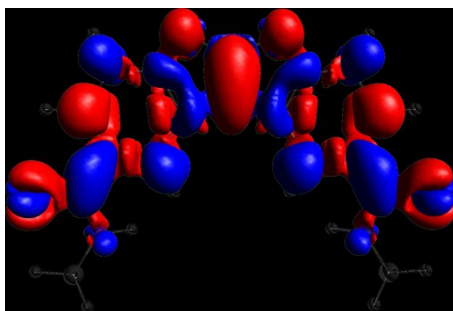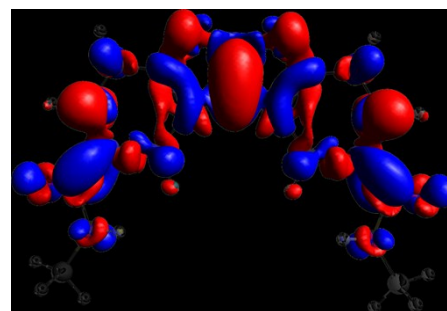

S<sub>5</sub>

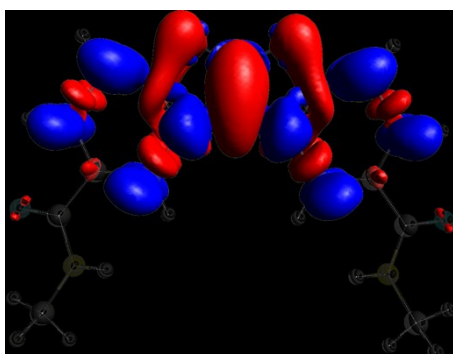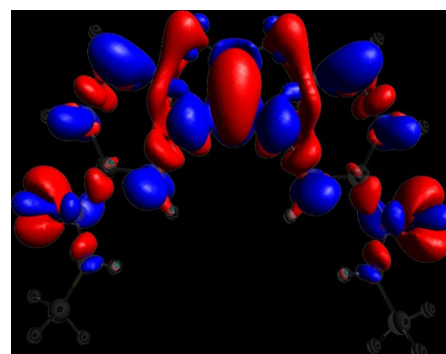

**Supplementary Figure S8.** Density differences of the brightest transitions ( $S_0$ - $S_1$  and  $S_0$ - $S_5$ ) of dimethyl benzofurobenzofurane dicarboxylate **9** computed at both the ADC(2) level (isodensities = -0.0005 (red) and +0.0005 (blue)) and TDA-PBE0 level (isodensities = -0.0008 (red) and +0.0008 (blue)).

## 2. Supplementary Tables S1–S2

**Table S1.** Excitation energies for **9** at the TDA-PBE0/def2-SVP and the ADC(2)/def2-SVP level. Oscillator strengths are reported in parentheses. Note the quantitative agreement between the vertical excitation energies computed at the TDA-PBE0 and ADC(2) levels. To ensure the correct attribution of the character of the brightest states, the relaxed density differences computed at the TDA-PBE0 level are compared to the density differences from the ADC(2) computations (see Supplementary Figure S6).

| excitation                | PBE0            | ADC(2)          |
|---------------------------|-----------------|-----------------|
| S <sub>1</sub> (vertical) | 4.34 eV (0.031) | 4.54 eV (0.032) |
| S <sub>2</sub> (vertical) | 4.46 eV (0.002) | 4.61 eV (0.008) |
| S <sub>3</sub> (vertical) | 4.73 eV (0.009) | 4.77 eV (0.001) |
| S <sub>4</sub> (vertical) | 4.74 eV (0.004) | 4.79 eV (0.002) |
| S <sub>5</sub> (vertical) | 4.80 eV (0.345) | 5.11 eV (0.604) |

**Table S2.** Crystallographic and refinement data of compounds **6** and **8**.

| Identification code                              | <b>6</b>                                                                                              | <b>8</b>                                                        |
|--------------------------------------------------|-------------------------------------------------------------------------------------------------------|-----------------------------------------------------------------|
| Empirical formula                                | 2(C <sub>22</sub> H <sub>24</sub> N <sub>2</sub> O <sub>5</sub> ), 3(C <sub>2</sub> H <sub>6</sub> O) | C <sub>22</sub> H <sub>20</sub> O <sub>6</sub>                  |
| Formula weight (g/mol)                           | 931.06                                                                                                | 380.38                                                          |
| Temperature (K)                                  | 140.00(10)                                                                                            | 100.01(10)                                                      |
| Wavelength (Å)                                   | 1.54184                                                                                               | 1.54184                                                         |
| Crystal system                                   | Triclinic                                                                                             | Triclinic                                                       |
| Space group                                      | <i>P</i> $\bar{1}$                                                                                    | <i>P</i> $\bar{1}$                                              |
| a (Å)                                            | 10.1910(3)                                                                                            | 8.7557(4)                                                       |
| b (Å)                                            | 13.7072(3)                                                                                            | 10.3822(4)                                                      |
| c (Å)                                            | 19.0724(5)                                                                                            | 11.1677(5)                                                      |
| $\alpha$ (°)                                     | 90.789(2)                                                                                             | 63.052(4)                                                       |
| $\beta$ (°)                                      | 103.313(3)                                                                                            | 82.840(4)                                                       |
| $\gamma$ (°)                                     | 109.953(2)                                                                                            | 86.270(4)                                                       |
| Volume (Å <sup>3</sup> )                         | 2424.57(12)                                                                                           | 897.85(8)                                                       |
| Z                                                | 2                                                                                                     | 2                                                               |
| Density (calculated) (Mg/m <sup>3</sup> )        | 1.275                                                                                                 | 1.407                                                           |
| Absorption coefficient (mm <sup>-1</sup> )       | 0.757                                                                                                 | 0.850                                                           |
| F(000)                                           | 996                                                                                                   | 400                                                             |
| Crystal size (mm <sup>3</sup> )                  | 0.545 x 0.445 x 0.360                                                                                 | 0.309 x 0.214 x 0.135                                           |
| Theta range for data collection (°)              | 3.448 to 76.154                                                                                       | 4.467 to 76.788                                                 |
| Index ranges                                     | -12 ≤ h ≤ 12<br>-9 ≤ k ≤ 17<br>-23 ≤ l ≤ 23                                                           | -10 ≤ h ≤ 10<br>-10 ≤ k ≤ 13<br>-14 ≤ l ≤ 14                    |
| Reflections collected                            | 17613                                                                                                 | 7574                                                            |
| Independent reflections                          | 9787 [ <i>R</i> <sub>(int)</sub> = 0.0198]                                                            | 3705 [ <i>R</i> <sub>(int)</sub> = 0.0129]                      |
| Data completeness                                | 99.9 %                                                                                                | 99.8 %                                                          |
| Absorption correction                            | Semi-empirical from equivalents                                                                       | Gaussian                                                        |
| Max. and min. transmission                       | 1.00000 and 0.30076                                                                                   | 0.916 and 0.843                                                 |
| Refinement method                                | Full-matrix least-squares on <i>F</i> <sup>2</sup>                                                    | Full-matrix least-squares on <i>F</i> <sup>2</sup>              |
| Data / restraints / parameters                   | 9787 / 40 / 664                                                                                       | 3705 / 0 / 333                                                  |
| Goodness-of-fit on <i>F</i> <sup>2</sup>         | 1.036                                                                                                 | 1.041                                                           |
| Final R indices [ <i>I</i> > 2σ( <i>I</i> )]     | <i>R</i> <sub>1</sub> = 0.0444, <i>wR</i> <sub>2</sub> = 0.1265                                       | <i>R</i> <sub>1</sub> = 0.0356, <i>wR</i> <sub>2</sub> = 0.0915 |
| R indices (all data)                             | <i>R</i> <sub>1</sub> = 0.0496, <i>wR</i> <sub>2</sub> = 0.1322                                       | <i>R</i> <sub>1</sub> = 0.0371, <i>wR</i> <sub>2</sub> = 0.0927 |
| Largest diff. peak and hole (e.Å <sup>-3</sup> ) | 0.366 and -0.245                                                                                      | 0.299 and -0.193                                                |

### 3. NMR Spectra

$^1\text{H}$  NMR spectrum (DMSO- $d_6$ , 400 MHz) of **3**

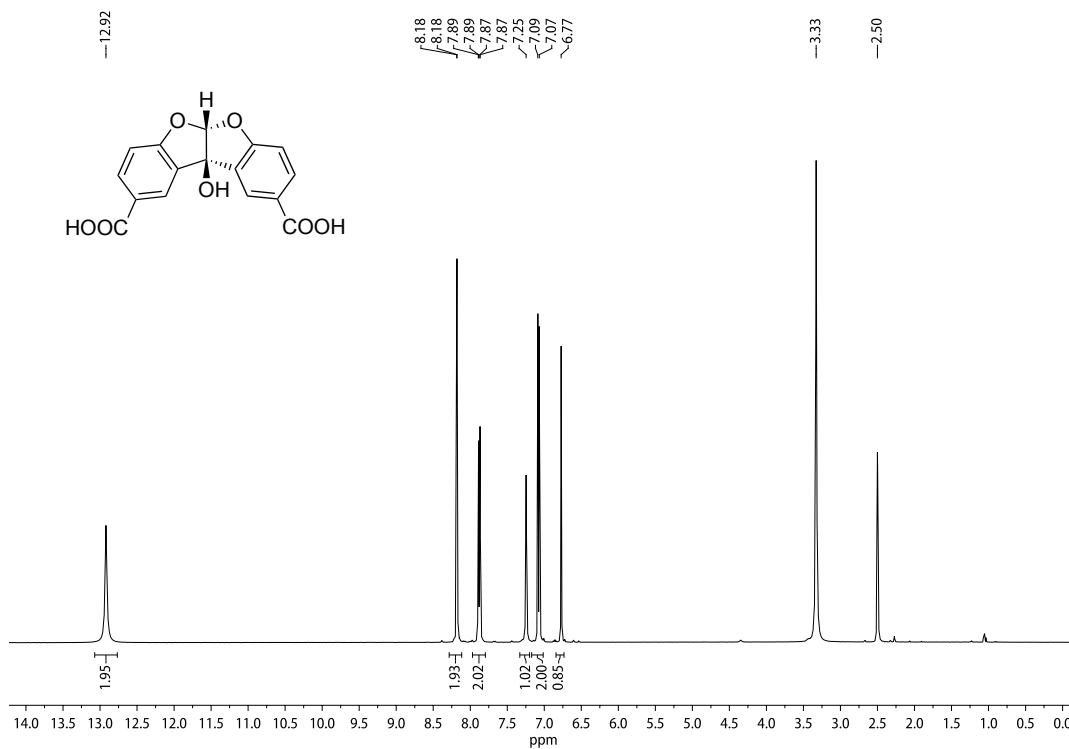

$^1\text{H}$ - $^1\text{H}$  COSY NMR spectrum (DMSO- $d_6$ ) of **3**

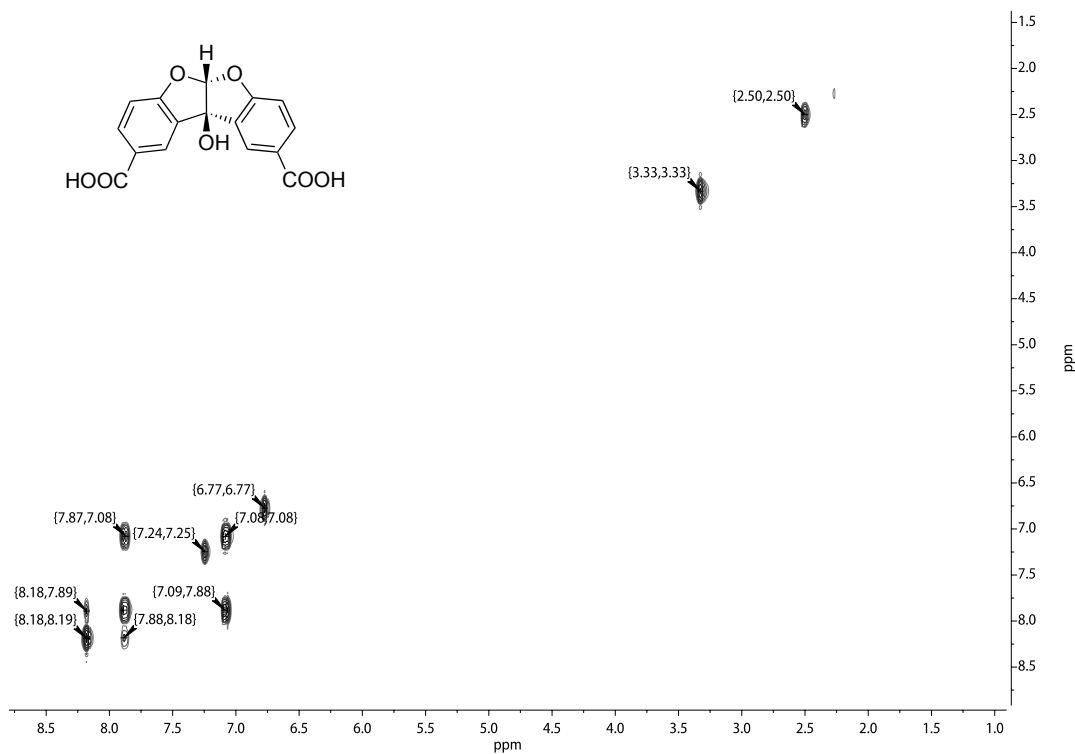

$^{13}\text{C}$  NMR spectrum (DMSO- $d_6$ , 101 MHz) of **3**

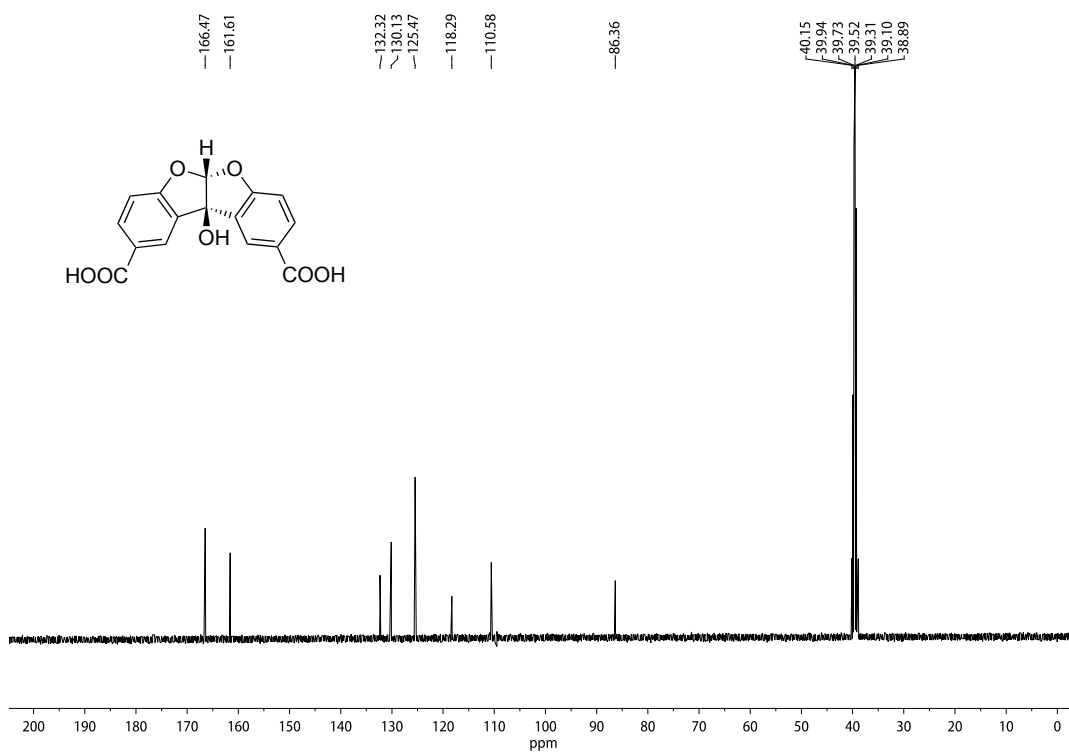

$^1\text{H}$ - $^{13}\text{C}$  HSQC NMR spectrum (DMSO- $d_6$ ) of **3**

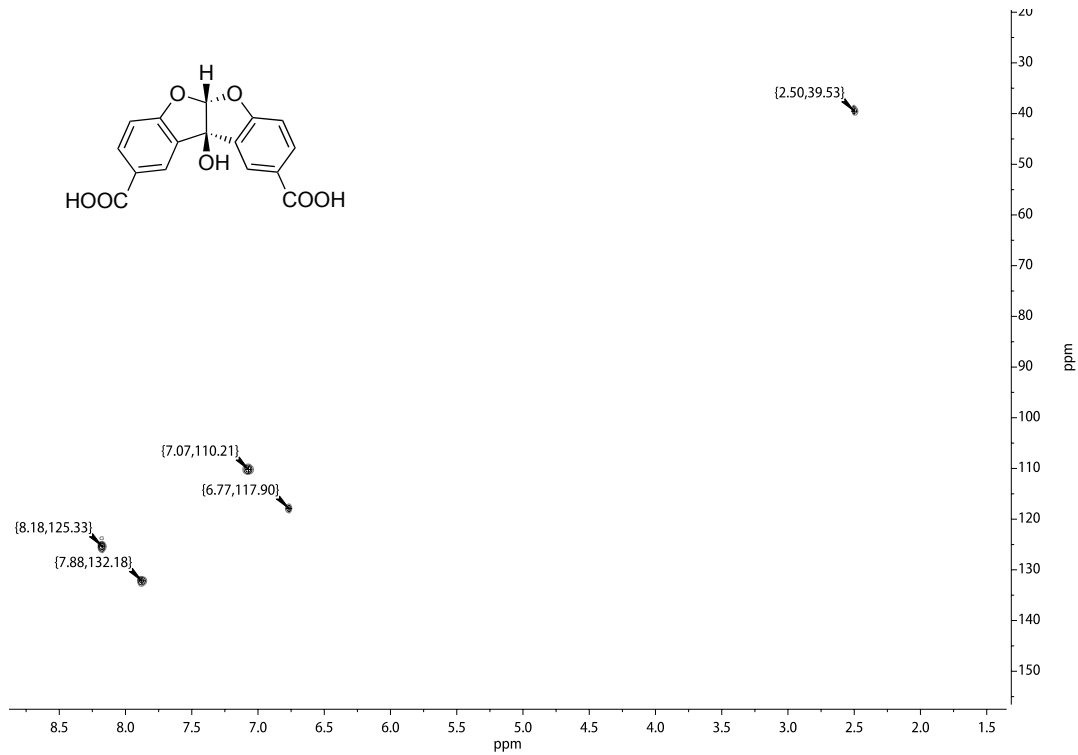

$^1\text{H}$  NMR spectrum (DMSO- $d_6$ , 400 MHz) of **4**

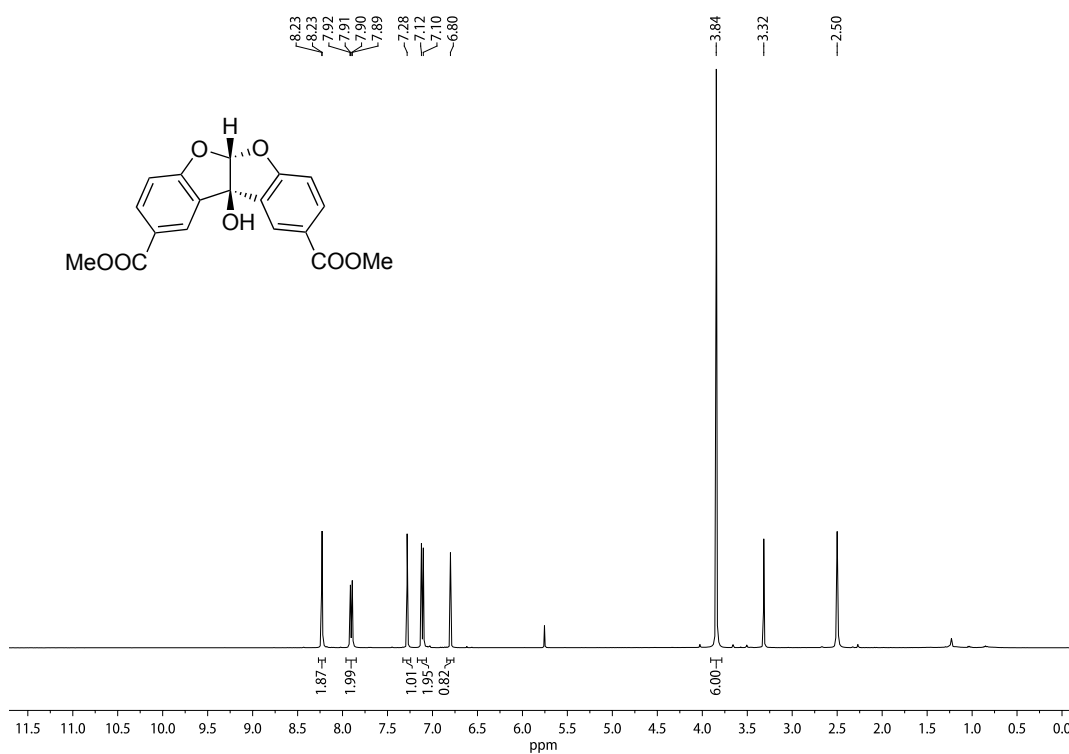

$^{13}\text{C}$  NMR spectrum (DMSO- $d_6$ , 101 MHz) of **4**

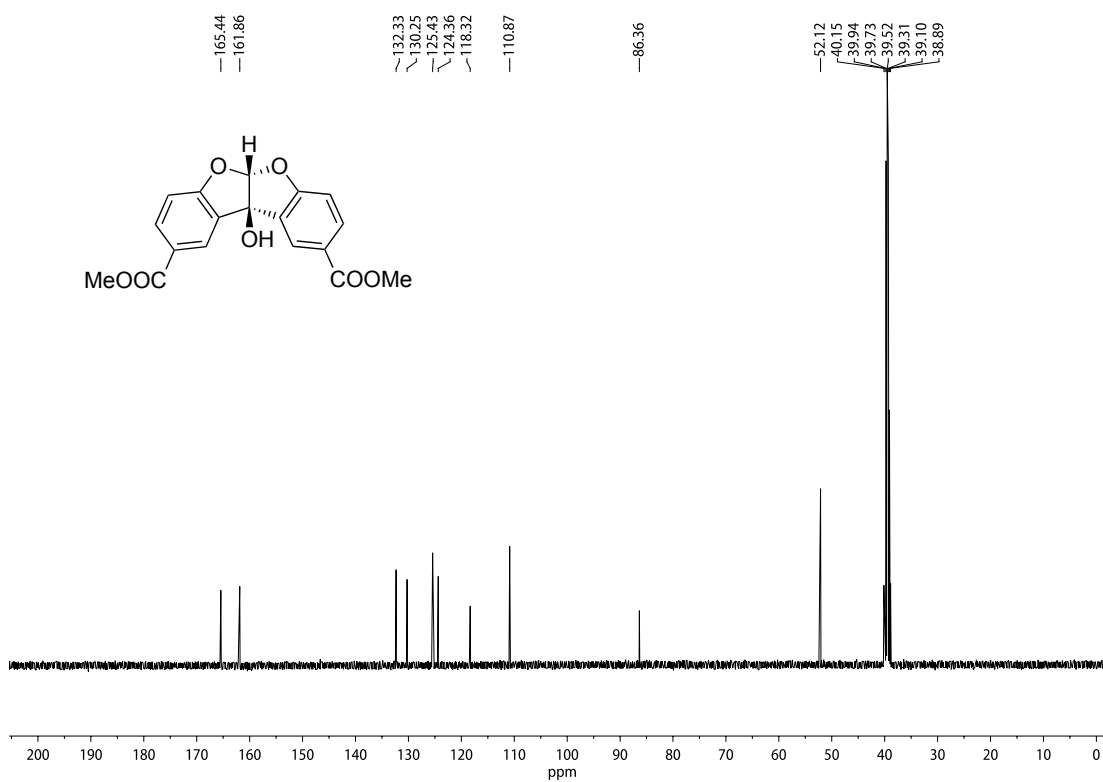

$^1\text{H}$  NMR spectrum ( $\text{CDCl}_3$ , 400 MHz) of **5**

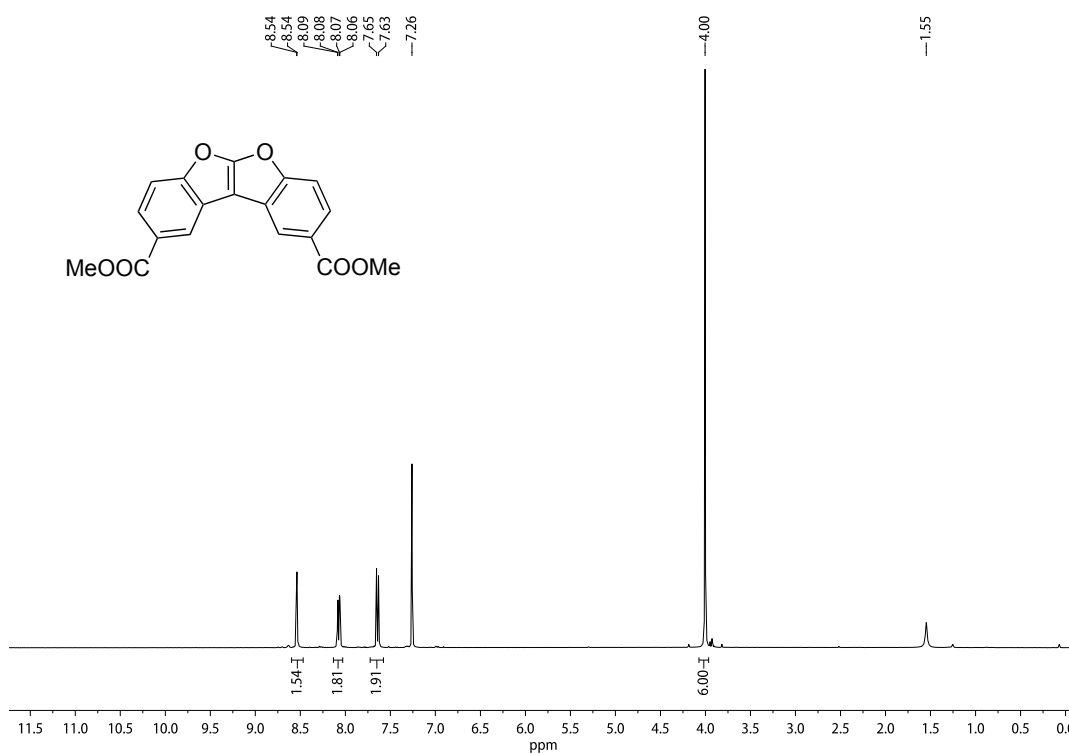

$^1\text{H}$  NMR spectrum ( $\text{DMSO}-d_6$ , 400 MHz) of **5**

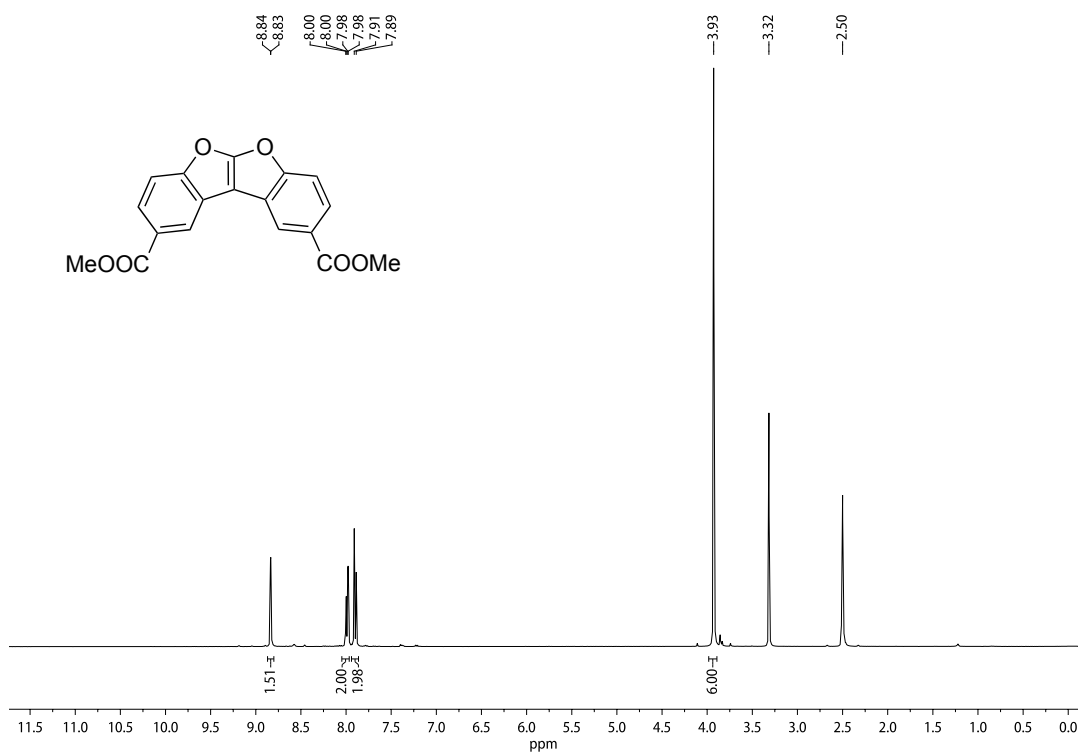



$^{13}\text{C}$  NMR spectrum ( $\text{CDCl}_3$ , 101 MHz) of **5**

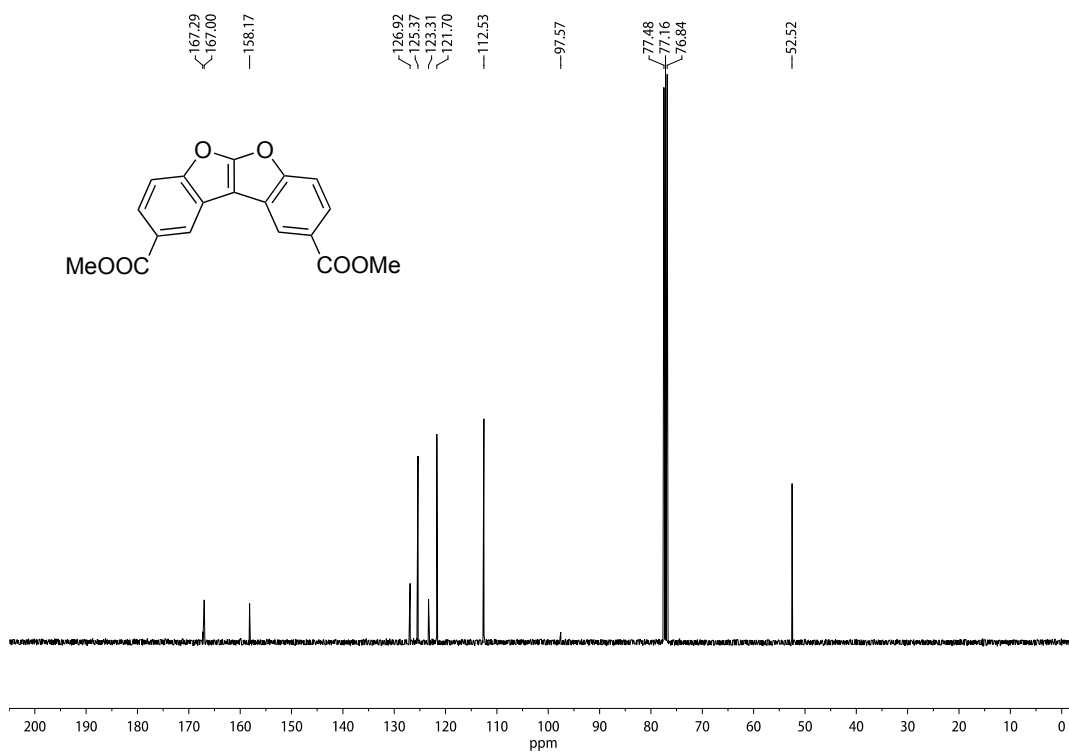

$^{13}\text{C}$  NMR spectrum ( $\text{DMSO}-d_6$ , 101 MHz) of **5**

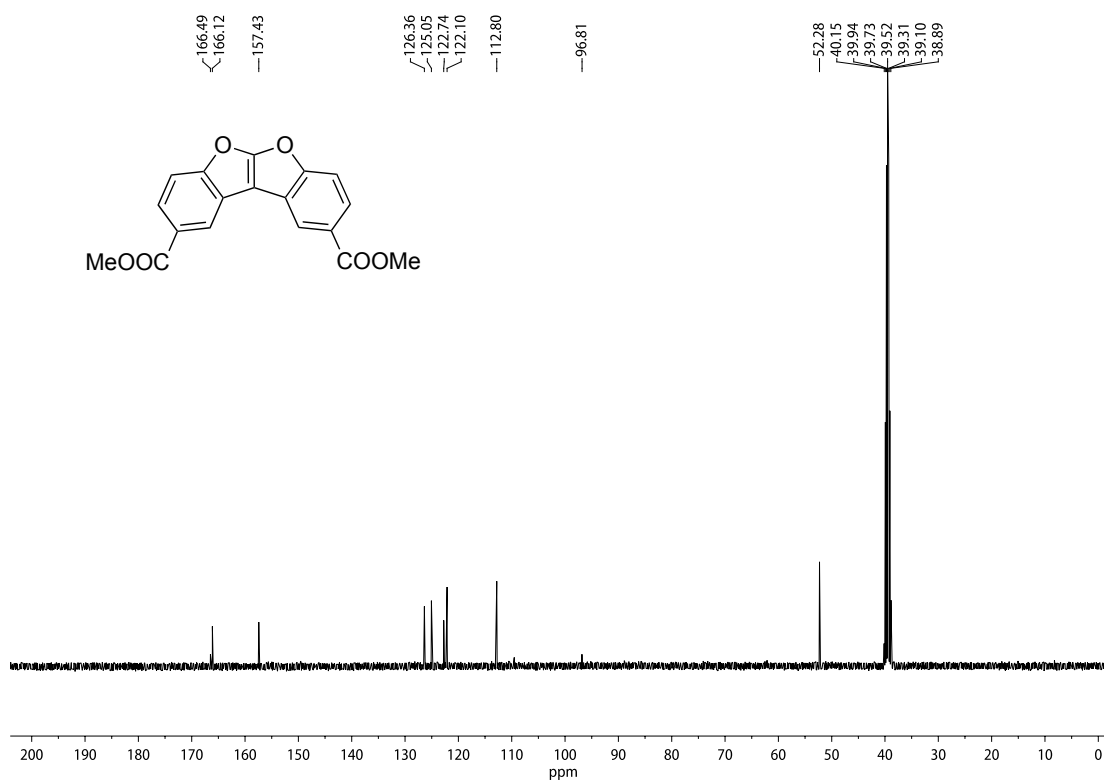

$^1\text{H}$  NMR spectrum (DMSO- $d_6$ , 400 MHz) of **2**

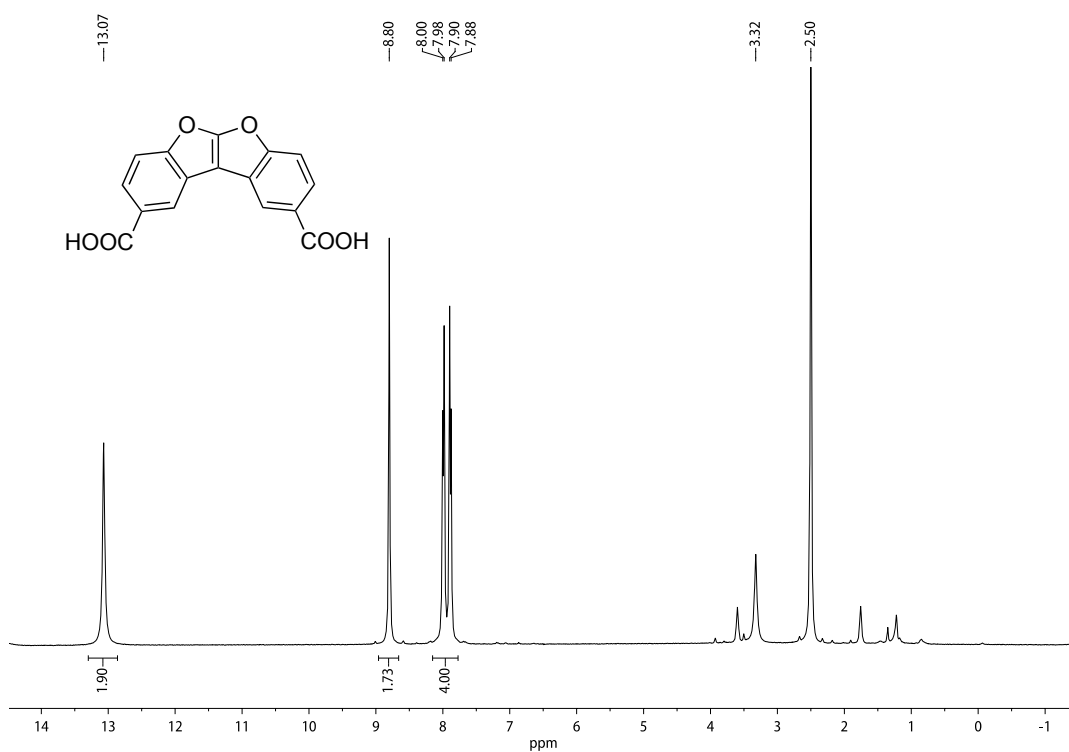

$^{13}\text{C}$  NMR spectrum (DMSO- $d_6$ , 101 MHz) of **2**

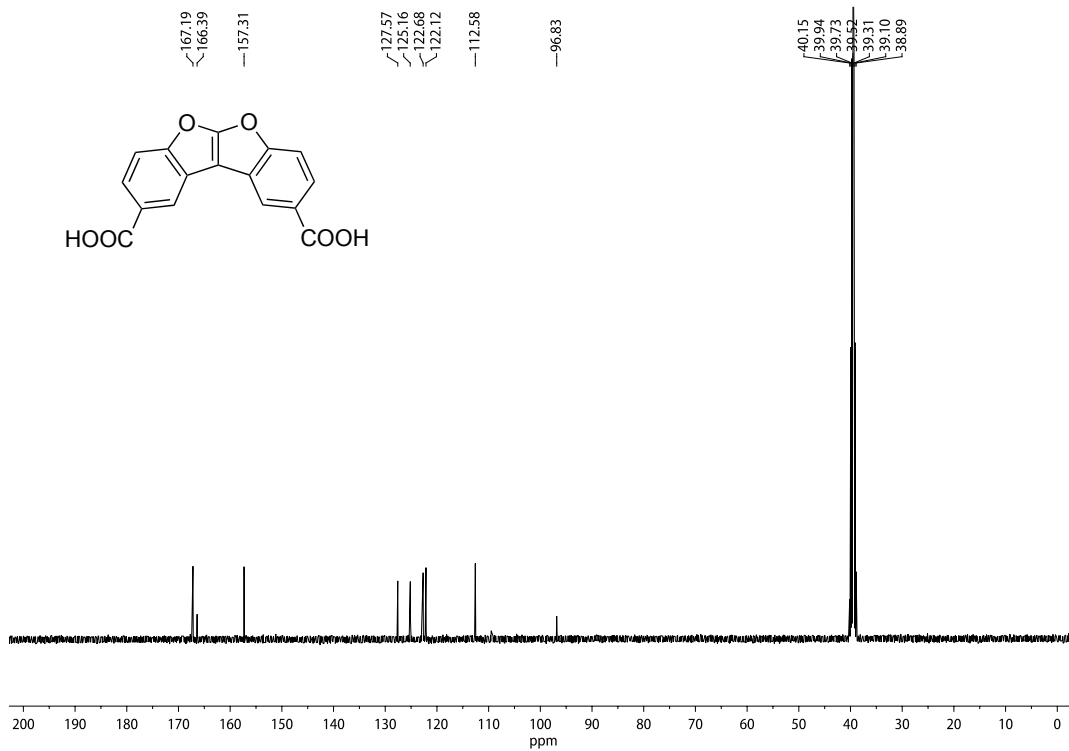

$^1\text{H}$  NMR spectrum (DMSO- $d_6$ , 400 MHz) of model compound **6** (co-crystals with EtOH)

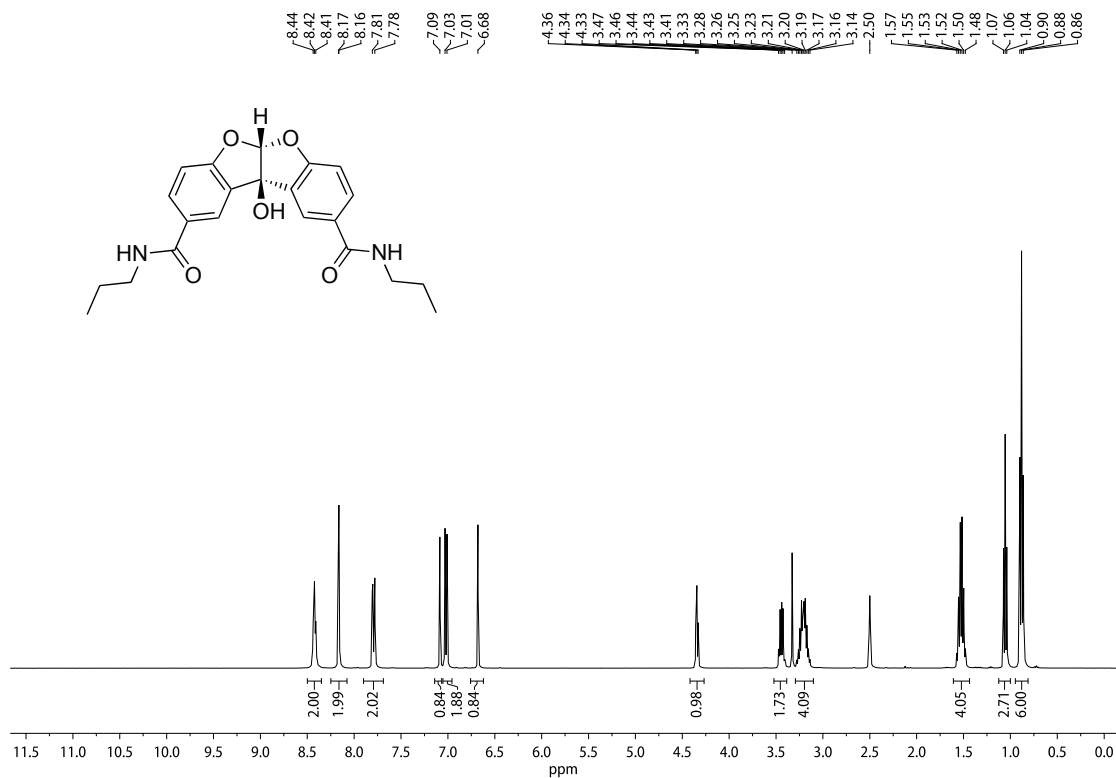

$^{13}\text{C}$  NMR spectrum (DMSO- $d_6$ , 101 MHz) of model compound **6** (co-crystals with EtOH)

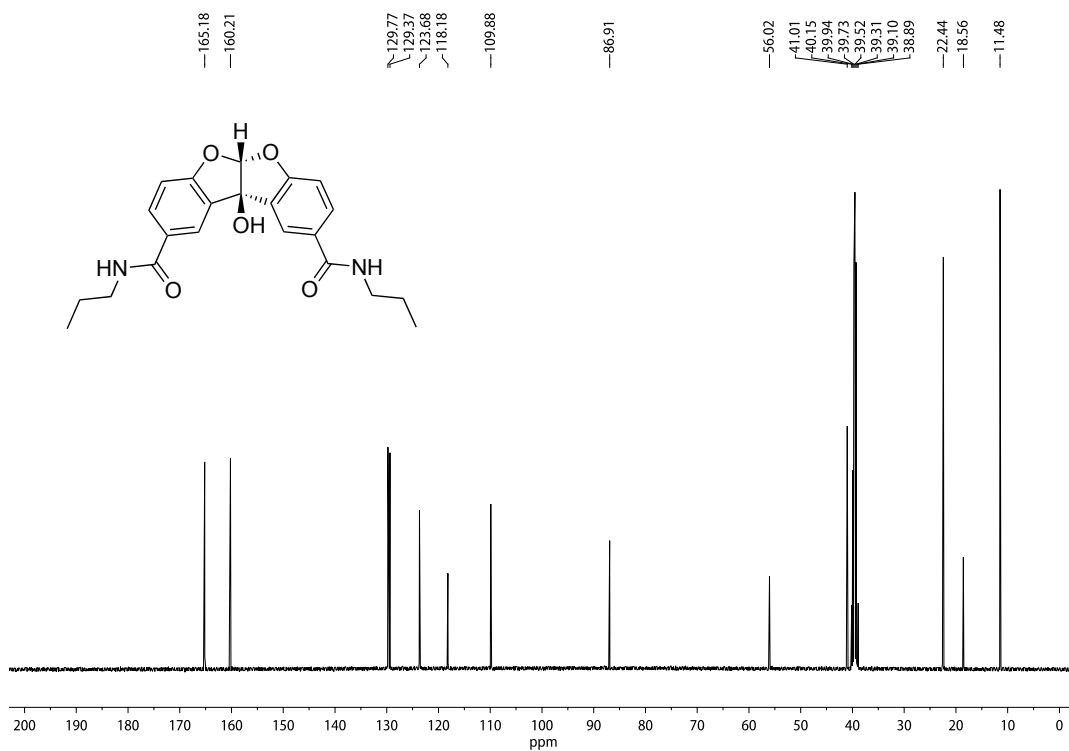

<sup>1</sup>H NMR spectrum (CDCl<sub>3</sub>, 400 MHz) of model compound 7

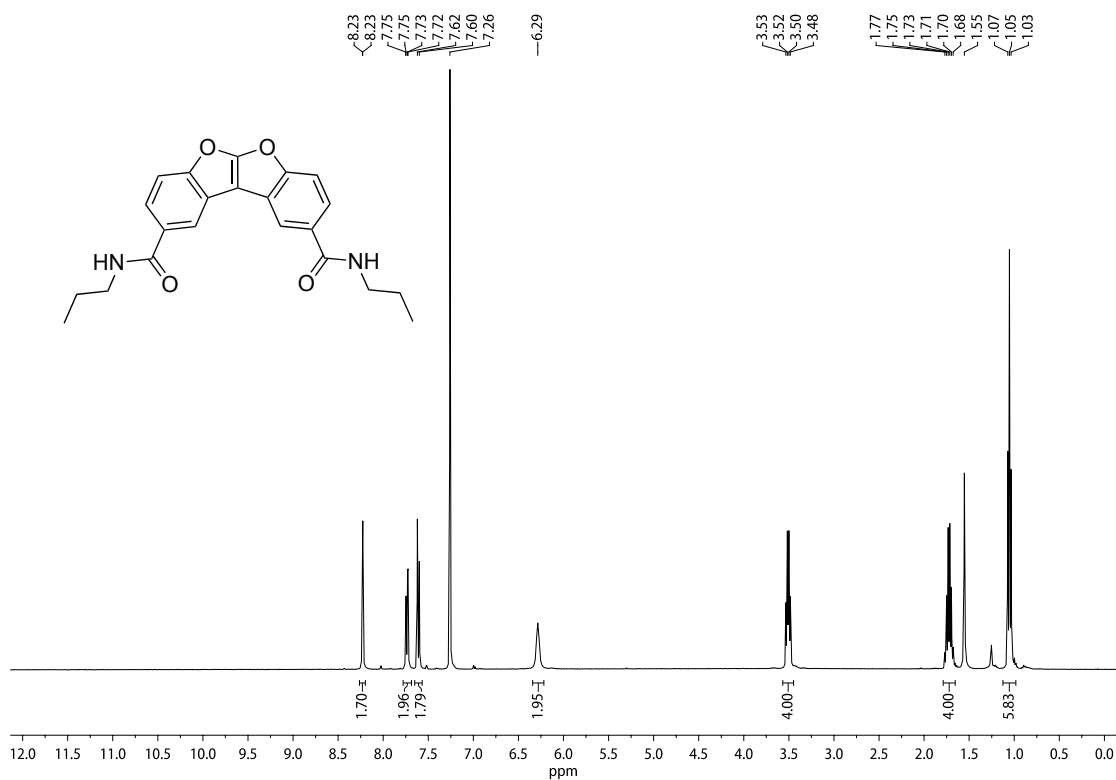

<sup>13</sup>C NMR spectrum (DMSO-*d*<sub>6</sub>, 101 MHz) of model compound 7

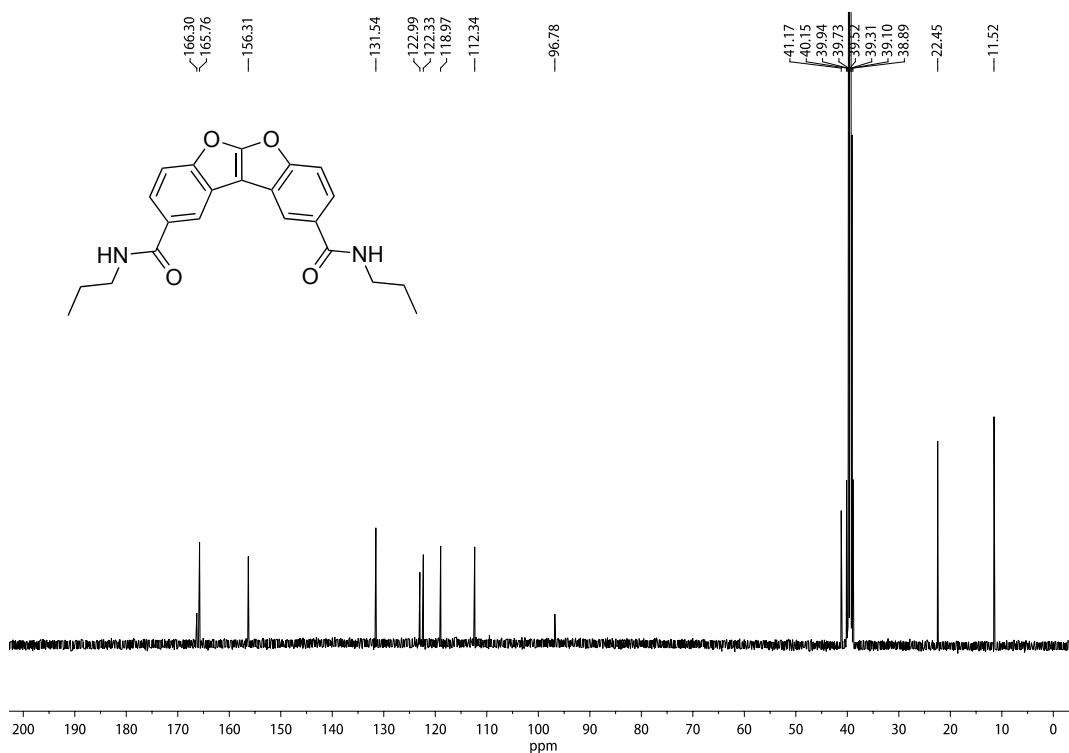

$^1\text{H}$  NMR spectrum ( $\text{CDCl}_3$ , 400 MHz) of model compound **8**

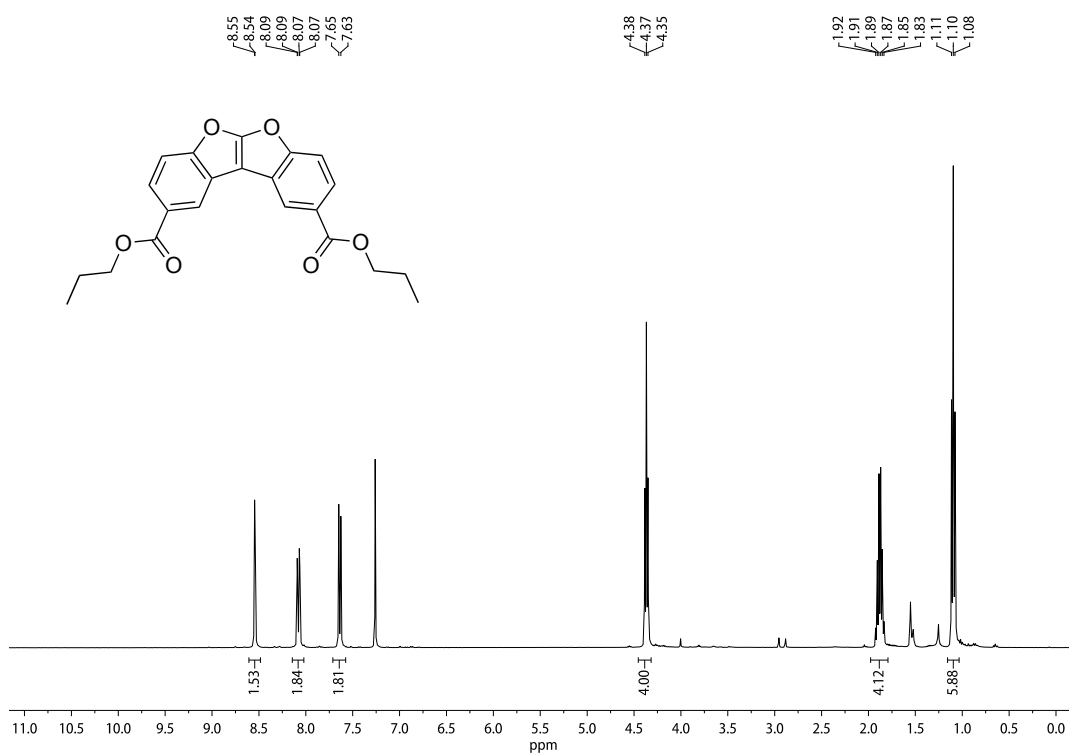

$^{13}\text{C}$  NMR spectrum ( $\text{DMSO}-d_6$ , 101 MHz) of model compound **8**

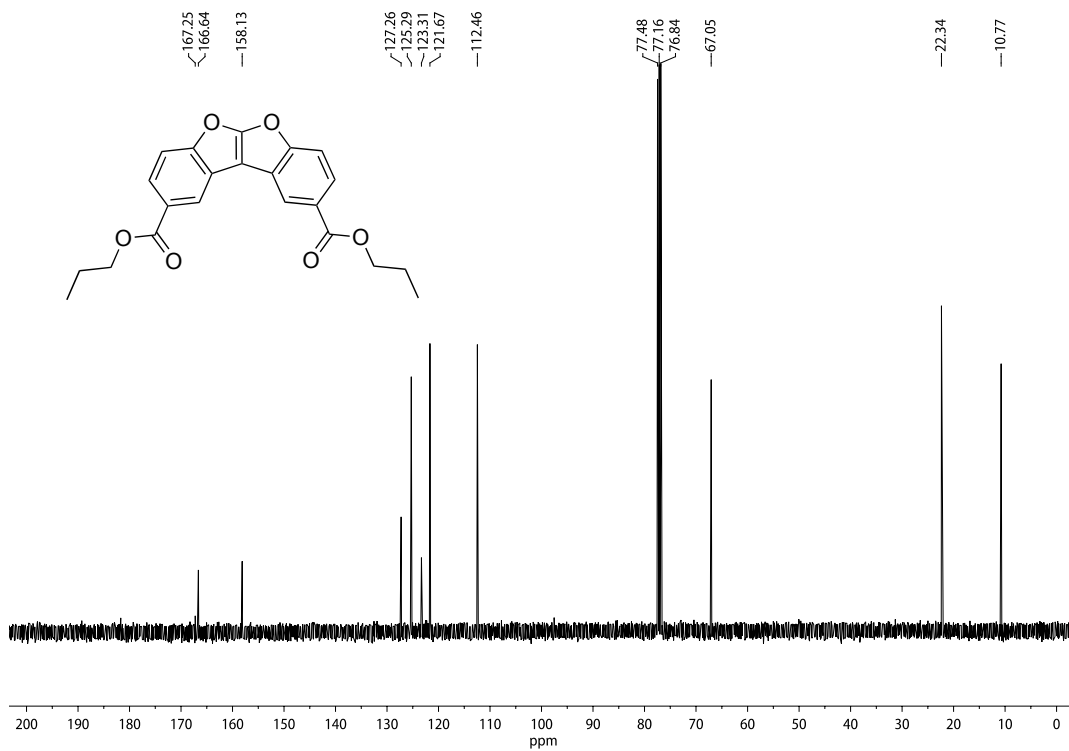

Supplement: c7py00129k1.pdf [file c7py00129k1.pdf]
